# Supplementary material for: Lead-Free Piezoelectric Acceleration Sensor Built Using a (K,Na)NbO3 Bulk Ceramic Modified by Bi-Based Perovskites
Source: MDPI journal article supplement (doi:10.3390/s23021029), 2023-01-16
Supplement: s1 [file s1]

## **Supplementary Information**

### **Lead-Free Piezoelectric Acceleration Sensor Built Using a (K,Na)NbO<sub>3</sub> Bulk Ceramic Modified by Bi-Based Perovskites**

**Min-Ku Lee, Byung-Hoon Kim and Gyoung-Ja Lee \***

Smart Sensing and Diagnosis Research Division, Korea Atomic Energy Research Institute, Daejeon  
34057, Republic of Korea

\* Correspondence: leegj@kaeri.re.kr; Tel.: +82-42-868-4838

Table S1. Component materials and their mechanical properties (density, Young’s modulus, and Poisson’s ratio).

| Component        | Material            | Density (kg/m <sup>3</sup> ) | Young’s modulus (GPa) | Poisson’s Ratio (-) |
|------------------|---------------------|------------------------------|-----------------------|---------------------|
| Head             | Tungsten            | 17,900                       | 385                   | 0.2                 |
| Tail             | 316 stainless steel | 7767                         | 193                   | 0.29                |
| Base             | 316 stainless steel | 7767                         | 193                   | 0.29                |
| Insulating layer | Epoxy               | 1400                         | 9.5                   | 0.35                |

Table S2. Electrical and mechanical properties of KNN-based piezoceramic used for numerical simulation [34].

| Physical properties          |                 | Piezoelectric coefficient (pC/N) |                        |                        | Dielectric constant                     | Elastic compliance (10 <sup>-12</sup> m <sup>2</sup> /N) |                                     |                                     |                                     |                                     |                                     |
|------------------------------|-----------------|----------------------------------|------------------------|------------------------|-----------------------------------------|----------------------------------------------------------|-------------------------------------|-------------------------------------|-------------------------------------|-------------------------------------|-------------------------------------|
| Density (kg/m <sup>3</sup> ) | Poisson’s ratio | <i>d</i> <sub>31</sub>           | <i>d</i> <sub>33</sub> | <i>d</i> <sub>15</sub> | $\epsilon_{33}/\epsilon_0$ <sup>1</sup> | <i>S</i> <sub>11</sub> <sup>E</sup>                      | <i>S</i> <sub>12</sub> <sup>E</sup> | <i>S</i> <sub>13</sub> <sup>E</sup> | <i>S</i> <sub>33</sub> <sup>E</sup> | <i>S</i> <sub>44</sub> <sup>E</sup> | <i>S</i> <sub>66</sub> <sup>E</sup> |
| 4100                         | 0.3             | -159                             | 321                    | 602                    | 523                                     | 12.8                                                     | -4.42                               | -5.21                               | 12.3                                | 40.9                                | 34.4                                |

<sup>1</sup> $\epsilon_0 = 8.85 \times 10^{-12}$  F/m

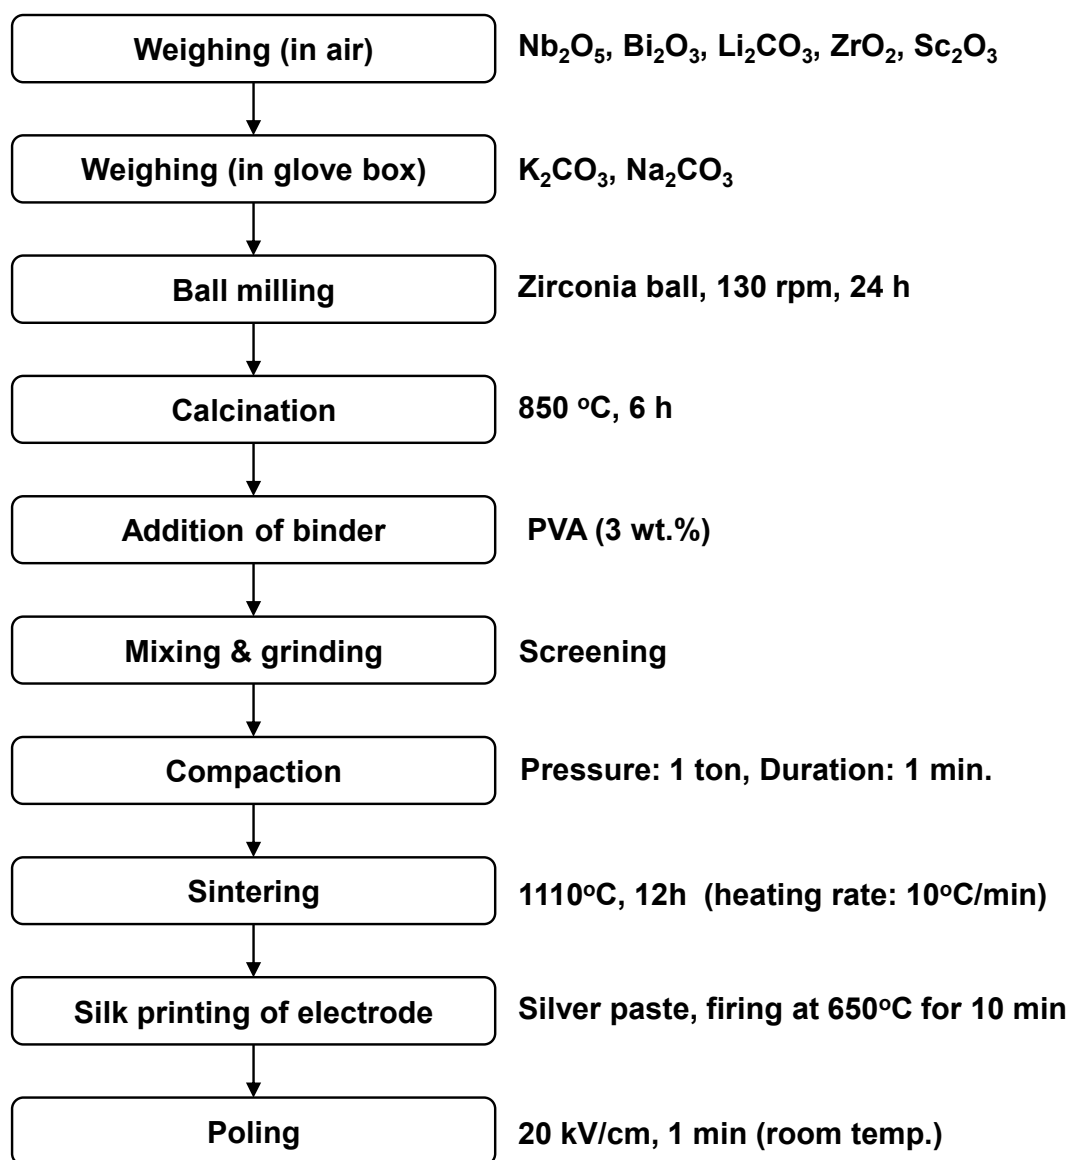

**Figure S1.** Preparation conditions of KNN-0.03BNKLZ-0.01BS ceramic rings by conventional solid-state powder method.

[The methodology of design optimization]

The finite element analysis (FEA) was performed using a commercial finite element program (ANSYS V18). The total number of elements was 124,800 and the number of nodes was 134,977. Design of experiments (DOE) techniques [48,49] were used to carry out simulation experiments efficiently. The values of the resonant frequency and charge sensitivity were numerically calculated by piezoelectric analysis using the DOE test points. The total number of DOE test points was 201. Using the DOE test points, we carried out metamodeling, which is known as more efficient than the actual analytical model [50,51], to approximate the relationship between the design variables (input) and the performances (output). Since the sensor in this work includes many geometrical design variables and nonlinear characteristics, the kriging model [52], which is a global approximation model, was adopted as a metamodel. Using the kriging model, ten design variables were optimized by a program called Easy Design. The optimization was conducted to find the optimal values of the design variables ( $x_1$  to  $x_{10}$ ) by which the charge sensitivity could be maximized at different resonant frequencies ranging from 20 to 50 kHz. Here, the charge sensitivity was obtained using a sine-wave acceleration of 1 g at 159 Hz.

48. Ross, P. *Taguchi Techniques for Quality Engineering*; McGraw-Hill: New York, NY, USA, 1996.
49. Montgomery, D.C. *Design Analyses of Experiments*, 3rd ed.; John Wiley & Sons: New York, NY, USA, 1997.
50. Kumar, V. Optimization and modelling of process parameters involved in ultrasonic machining of glass using design of experiments and regression approach. *Am. J. Mater. Eng. Technol.* **2013**, *1*, 13–18.
51. Kumar, J.P.N.; Kumar, S.J.; Jeyathilak, R.K.S.; Venkatesh, M.; Christopher, A.S.; Ganesh, K.C. Effect of design parameters on the static mechanical behavior of metal bellows using design of experiment and finite element analysis. *Int. J. Interact. Des. Manuf.* **2017**, *11*, 535–545.
52. Huang, D.; Allen, T.T.; Notz, W.I.; Zeng, N. Global optimization of stochastic black-box systems via sequential Kriging meta-models. *J. Glob. Optim.* **2006**, *34*, 441–466.

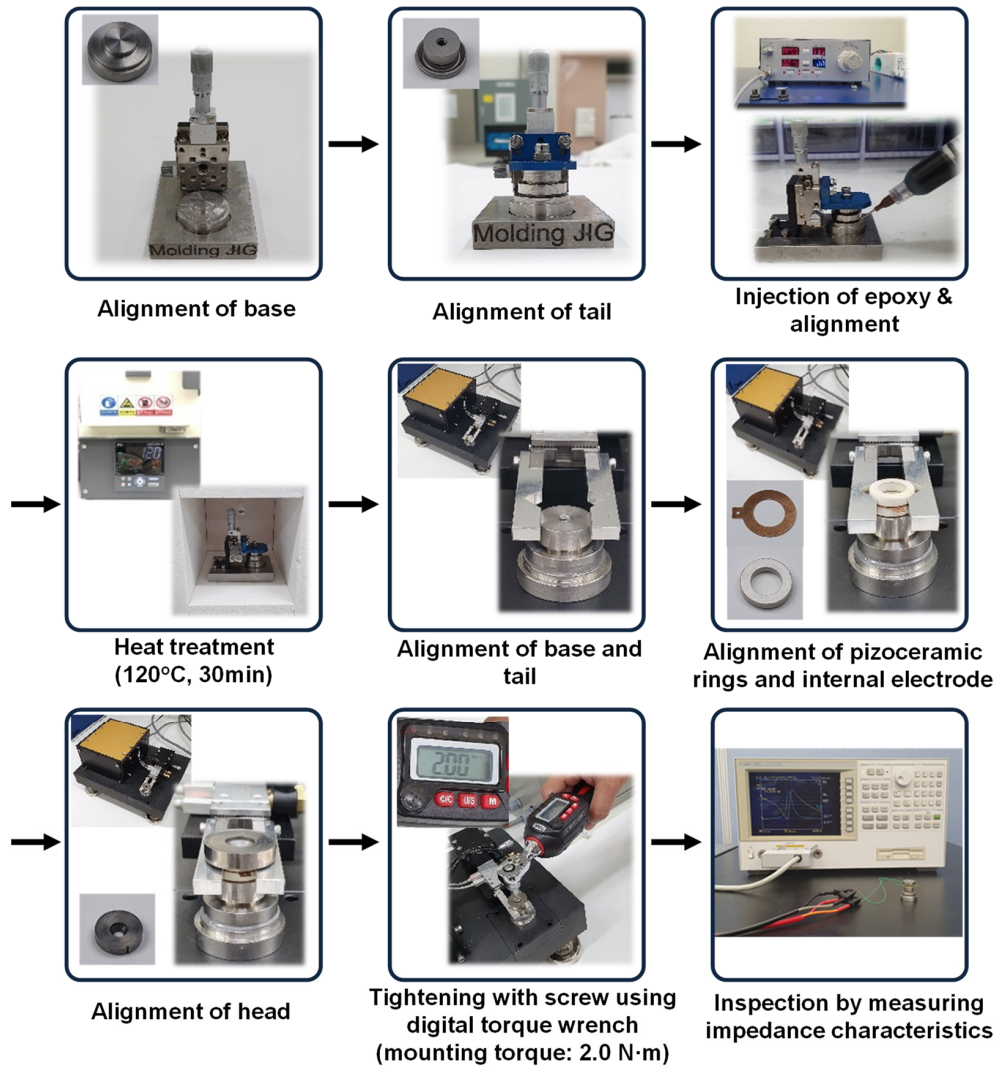

**Figure S2.** Fabrication procedures of a compressive-type piezoelectric accelerometer prototype using KNN-BNKLZ-BS ceramic rings and sensor components: specially designed jig was used for reliable alignments of each sensor component and an injection mold of our own design was also used to precisely control the amount of epoxy to be injected.

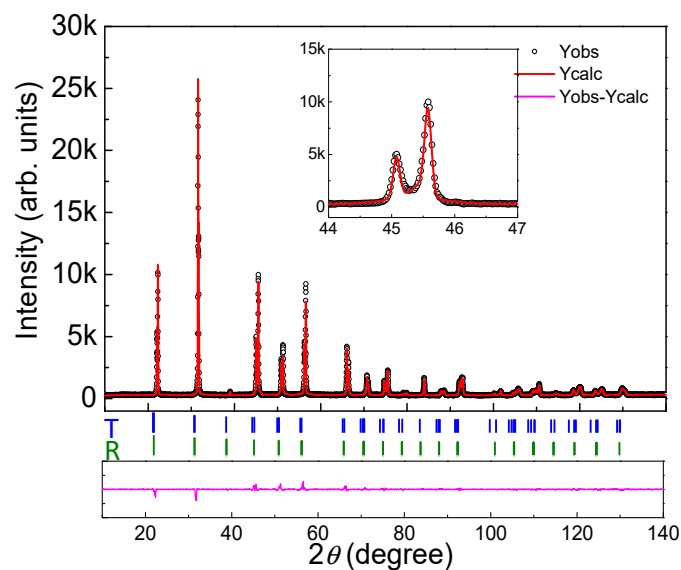

| Sample                                         | KNN-0.03BNKLZ-0.01BS       |
|------------------------------------------------|----------------------------|
| Space group                                    | <i>R3m</i><br><i>P4mm</i>  |
| Cell parameter for <i>R3m</i> space group (Å)  | 3.9783<br>3.9783<br>3.9783 |
| Cell parameter for <i>P4mm</i> space group (Å) | 3.9716<br>3.9716<br>4.0134 |
| Tetragonal phase (%)                           | 86.1                       |
| Rhombohedral phase (%)                         | 13.9                       |
| Reliability factor $R_{wp}$ (%)                | 8.76                       |
| Goodness-of-fit indicator $S$                  | 1.3871                     |

**Figure S3.** Rietveld refinement of the XRD pattern of the KNN-003BNKLZ-0.01BS ceramic ring. Results of cell parameters, phase fraction and reliability factors ( $R_{wp}$  and  $S$ ) are listed in the table.

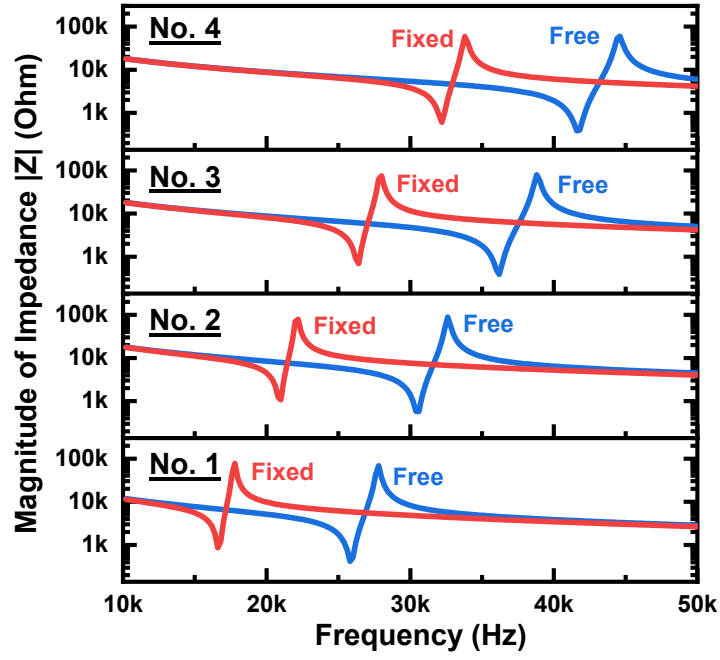

| Design no. | Condition | $f_r$ (kHz) | $ Z_r $ ( $\Omega$ ) | $f_a$ (kHz) | $ Z_a $ ( $\Omega$ ) |
|------------|-----------|-------------|----------------------|-------------|----------------------|
| 1          | Free      | 25.9        | 419.49               | 27.8        | 68868.7              |
|            | Fixed     | 16.6        | 864.719              | 17.8        | 78358                |
| 2          | Free      | 30.6        | 578.072              | 32.6        | 88682.5              |
|            | Fixed     | 20.8        | 1824.13              | 22.2        | 50671.3              |
| 3          | Free      | 36.2        | 393.283              | 38.8        | 79289.8              |
|            | Fixed     | 26.4        | 697.379              | 28.8        | 74600.5              |
| 4          | Free      | 41.6        | 385.193              | 44.6        | 59731.6              |
|            | Fixed     | 32.2        | 604.759              | 33.8        | 58709.4              |

**Figure S4.** Impedance-frequency spectra and values of  $f_r$ ,  $f_a$  and  $Z$  obtained from numerical simulation using free and fixed boundary conditions for KNN-based accelerometer designs (nos. 1 to 4).

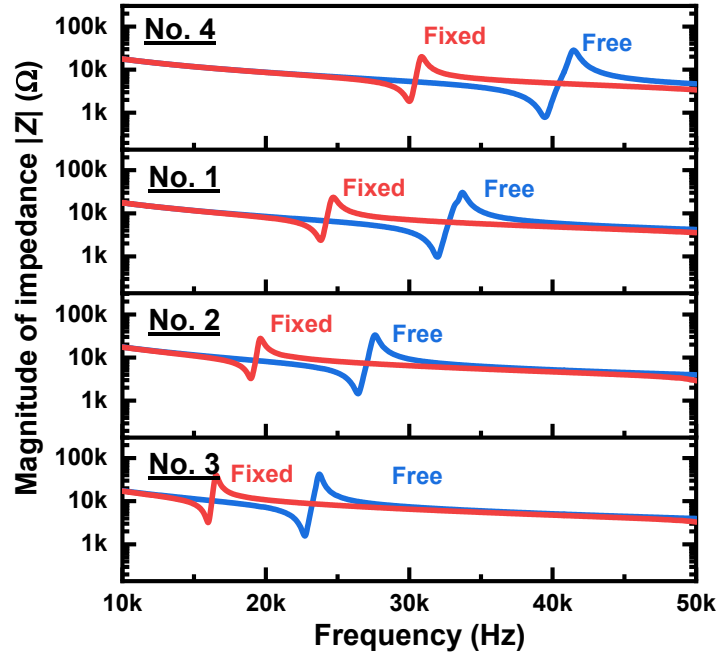

| Design no. | Condition | $f_r$ (kHz) | $ Z_r $ (Ω) | $f_a$ (kHz) | $ Z_a $ (Ω) |
|------------|-----------|-------------|-------------|-------------|-------------|
| 1          | Free      | 22.7        | 1563.7      | 23.7        | 42172       |
|            | Fixed     | 15.9        | 3192.4      | 16.5        | 40519       |
| 2          | Free      | 26.4        | 1449.7      | 27.6        | 33332       |
|            | Fixed     | 18.9        | 3265.5      | 19.6        | 27717       |
| 3          | Free      | 32.0        | 966.27      | 33.7        | 30440       |
|            | Fixed     | 23.8        | 2375.2      | 24.7        | 23545       |
| 4          | Free      | 39.4        | 780.24      | 41.5        | 28512       |
|            | Fixed     | 29.9        | 1848.7      | 30.9        | 19989       |

**Figure S5.** Impedance-frequency profiles and values of resonant and anti-resonant frequencies ( $f_r$  and  $f_a$ ) and magnitude of impedance  $|Z|$  experimentally measured under free and fixed conditions from impedance tests for KNN-based accelerometer prototypes (design nos. 1 to 4).
